Evolution of a novel chimeric maltotriose transporter in *Saccharomyces eubayanus* from parent proteins unable to perform this function.

Short title: Evolution of maltotriose consumption via a novel chimeric protein.

EmilyClare P. Baker<sup>1,2</sup> and Chris Todd Hittinger<sup>1,2,3\*</sup>

<sup>1</sup>Laboratory of Genetics, Genome Center of Wisconsin, Wisconsin Energy Institute, J. F. Crow Institute for the Study of Evolution, University of Wisconsin-Madison, Madison, WI 53706, USA

<sup>2</sup>Microbiology Doctoral Training Program, University of Wisconsin-Madison, Madison WI, 53706

<sup>3</sup>DOE Great Lakes Bioenergy Research Center, University of Wisconsin-Madison, Madison, WI 53706, USA

\*corresponding author

EB helped conceive of this project, designed and performed all experiments and analyses, and wrote this manuscript with input and edits from CTH.

CTH conceived of this project, helped write the manuscript, supervised all work, and provided financial support.

## 1 **Abstract**

2           At the molecular level, the evolution of new traits can be broadly divided between changes in  
3 gene expression and changes in protein structure. For proteins, the evolution of novel functions is  
4 generally thought to proceed through sequential point mutations or recombination of whole functional  
5 units. In *Saccharomyces*, the uptake of the sugar maltotriose into the cell is the primary limiting factor in  
6 its utilization, but maltotriose transporters are relatively rare, except in brewing strains. No known wild  
7 strains of *Saccharomyces eubayanus*, the cold-tolerant parent of hybrid lager-brewing yeasts  
8 (*Saccharomyces cerevisiae* x *S. eubayanus*), are able to consume maltotriose, which limits their ability to  
9 fully ferment malt extract. In one strain of *S. eubayanus*, we found a gene closely related to a known  
10 maltotriose transporter and were able to confer maltotriose consumption by overexpressing this gene  
11 or by passaging the strain on maltose. Even so, most wild strains of *S. eubayanus* lack native maltotriose  
12 transporters. To determine how this rare trait could evolve in naive genetic backgrounds, we performed  
13 an adaptive evolution experiment for maltotriose consumption, which yielded a single strain of *S.*  
14 *eubayanus* able to grow on maltotriose. We mapped the causative locus to a gene encoding a novel  
15 chimeric transporter that was formed by an ectopic recombination event between two genes encoding  
16 transporters that are unable to import maltotriose. In contrast to classic models of the evolution of  
17 novel protein functions, the recombination breakpoints occurred within functional domains. Thus, the  
18 ability of the new protein to carry maltotriose was likely acquired through epistatic interactions  
19 between independently evolved substitutions. By acquiring multiple mutations at once, the transporter  
20 rapidly gained a novel function, while bypassing potentially deleterious intermediate steps. This study  
21 provides an illuminating example of how recombination between paralogs can establish novel  
22 interactions among substitutions to create adaptive functions.

## 23 **Author summary**

24           Hybrids of the yeasts *Saccharomyces cerevisiae* and *Saccharomyces eubayanus* (lager-brewing  
25 yeasts) dominate the modern brewing industry. *S. cerevisiae*, also known as baker's yeast, is well-known  
26 for its role in industry and scientific research. Less well recognized is *S. eubayanus*, which was only  
27 discovered as a pure species in 2011. While most lager-brewing yeasts rapidly and completely utilize the  
28 important brewing sugar maltotriose, no strain of *S. eubayanus* isolated to date is known to do so.  
29 Despite being unable to consume maltotriose, we identified one strain of *S. eubayanus* carrying a gene  
30 for a functional maltotriose transporter, although most strains lack this gene. During an adaptive  
31 evolution experiment, a strain of *S. eubayanus* without native maltotriose transporters evolved the  
32 ability to grow on maltotriose. Maltotriose consumption in the evolved strain resulted from a chimeric  
33 transporter that arose through recombination between genes encoding parent proteins that were  
34 unable to transport maltotriose. Traditionally, functional chimeric proteins are thought to evolve by  
35 recombining discrete functional domains or modules, but the breakpoints in the chimera studied here  
36 occurred within modular units of the protein. These results support the less well-recognized role of  
37 recombination between paralogous sequences in generating novel proteins with adaptive functions.

## 38 **Introduction**

39           Proteins with novel functions can arise through a variety of mechanisms (1). One of the best  
40 studied mechanisms is gene duplication, followed by divergence through sequential point mutations  
41 (1,2). While this method of new protein evolution is thought to be common, evolution through stepwise  
42 point mutations can be a slow and constrained process (3). In the mutational landscape separating the  
43 original protein from the derived protein, deleterious epistatic interactions, where multiple  
44 intermediate mutational steps interact to create fitness valleys, can make new functions difficult to  
45 access by successive point mutations. Mutational events that result in multiple amino acid changes at

46 once can help bridge fitness valleys and speed the evolution of new functionality (3,4). As a  
47 consequence of bypassing intermediate mutational steps, recombination can lead to intragenic  
48 reciprocal sign epistasis, where the new recombinant protein has a function not found in either parent  
49 protein (3,5). Ectopic gene conversion, which results in chimeric protein sequences, is one such rare  
50 class of mutational events that can rapidly lead to new protein sequences with novel functions (3).

51 Chimeric protein-coding sequences have been found to be an important mechanism by which  
52 proteins can evolve new functions (1,6–8). They have been implicated in the rapid radiation of  
53 multicellular animals (6) and in playing a role in both infectious and non-infectious diseases in humans  
54 (9–12). The *Drosophila* gene *jingwei* was one of the first chimeric genes to have both its recent origin  
55 and evolution characterized in depth (1). *jingwei* exemplifies many of the characteristics usually  
56 associated with chimeric proteins (1,6–8,13). Like most other chimeric proteins that have been  
57 described in eukaryotes, *jingwei* is a large multidomain protein that was constructed via the movement  
58 of whole functional units (domains), facilitated by intronic sequences, a process referred to as domain or  
59 exon shuffling. In most cases, even in the absence of intronic sequences, the recombination of these  
60 modules has been considered key to the evolution of functional chimeric proteins (1,14).

61 The exchange of complete, independently functional units is not the only method by which  
62 functional chimeric proteins can be generated. Recombination within functional domains also has the  
63 potential to create proteins with novel characteristics. Recombination breakpoints within domains can  
64 lead to functional proteins, even between non-homologous protein sequences (4,15,16). However, since  
65 functionally important structures are likely to be conserved between related proteins, the probability of  
66 recombination resulting in a functional protein is higher between homologous sequences where  
67 essential within-protein interactions are less likely to be disrupted (4,15,17). Theoretical work has  
68 suggested the potential of this sort of recombination to allow proteins to rapidly bypass fitness minima  
69 in the adaptive landscape separating two protein functions (3,4). Recombination between paralogous

70 sequences has also been shown to be selected for in natural populations, suggesting that such  
71 sequences can indeed produce functional proteins (15,18). In addition, recombination between  
72 paralogous sequences (DNA shuffling) has been used as an efficient way to engineer proteins with  
73 functions that are rare or difficult to evolve in natural settings (reviewed in (19–21)). For example,  
74 hexose sugar transporters in *Saccharomyces cerevisiae* were evolved for increased specificity to a  
75 pentose sugar, D-xylose (22), through DNA shuffling and selection for the ability to support growth on  
76 xylose.

77 Maltotriose, a trimer of glucose molecules, is the second most abundant fermentable sugar  
78 present in brewing wort (malt extract), but it is also the most difficult to ferment (23–26). Among  
79 budding yeasts of the genus *Saccharomyces*, such as *S. cerevisiae*, proteins that can transport  
80 maltotriose into the cell are relatively rare (27–31). Improving consumption of maltotriose by  
81 *Saccharomyces* yeasts is of general interest to the brewing community since a key consideration for any  
82 new brewing strain is its ability to rapidly and completely ferment all the sugars present in wort. Work  
83 on improving the direct uptake of maltotriose in brewing yeasts has focused on the expression of the  
84 limited set of known maltotriose transporters, either through adaptive evolution for increased  
85 expression (32,33), introducing maltotriose transporters into new strains through selective breeding  
86 (34–42), or by heterologous expression (33,40,43). These methods all rely on the presence of functional  
87 maltotriose transporters, either natively or heterologously expressed, and are limited by the number of  
88 strains and proteins that are known to be capable of transporting maltotriose. With the focus on known  
89 transporters, how new maltotriose transporters evolve is less well studied (44,45).

90 Recently, special interest has been given to the development of *Saccharomyces eubayanus*, a  
91 distant cold-tolerant relative of *S. cerevisiae*, for commercial brewing (35,36,46,47). As a hybrid with *S.*  
92 *cerevisiae*, *S. eubayanus* forms the industrially important lager-brewing yeasts (48), which account for  
93 more than 90% of the total beer market. So far, no strain of *S. eubayanus* isolated from nature has been

94 reported to consume maltotriose (36,49–53), despite evidence for the possible presence of functional  
95 transporters in the *S. eubayanus* subgenome of industrial *S. cerevisiae* x *S. eubayanus* hybrids (i.e. lager-  
96 brewing yeasts) (28,54–58).

97 In the present study, we characterize the native *MALT* genes found in *S. eubayanus* for their  
98 ability to enable the transport of maltotriose and confirm the presence of maltotriose transporters in  
99 one strain of *S. eubayanus*, despite its inability to consume maltotriose. We also describe a novel  
100 chimeric maltotriose transporter that resulted from the adaptive evolution of *S. eubayanus* for  
101 maltotriose consumption. This new maltotriose transporter was formed through a partial ectopic gene  
102 conversion event between two *MALT* genes. Interestingly, the parent proteins that produced the  
103 chimera were unable to transport maltotriose themselves. In addition, the breakpoints of the chimeric  
104 region do not demarcate clearly defined functional domains, suggesting that epistatic interactions  
105 between novel residue combinations, rather than domain swapping, is responsible for the new function.  
106 Overall, this study reports the first known maltotriose transporters in *S. eubayanus* and the first strains  
107 of this species that are able to consume maltotriose. In addition, by characterizing one of the few  
108 chimeric proteins that have been described where recombination occurred naturally within functional  
109 modules (without being specifically targeted for engineering by DNA shuffling or mutagenesis), we  
110 provide insight into how proteins can evolve novel adaptive functions through rare genetic events.

## 111 **Results/Discussion**

### 112 **Maltotriose transporters in *S. eubayanus***

113 In the type strain of *S. eubayanus*, four genes, designated *MALT1-4*, have been identified as  
114 having homology to genes encoding known maltose transporters (*MALT* genes) (54,59). Because *MALT2*  
115 and *MALT4* are predicted to encode identical amino acid sequences (see Materials and Methods), we  
116 refer to these genes jointly as *MALT2/4*. To determine if they could enable maltotriose transport, Malt1,  
117 Malt2/4, and Malt3 were individually overexpressed using an inducible promoter in yHRVM108, a strain

118 of *S. eubayanus* isolated from North Carolina that is unable to grow on maltotriose and, unlike other  
 119 strains of *S. eubayanus*, grows sluggishly on maltose. None of these genes were able to confer growth  
 120 on maltotriose when overexpressed (Table 1).

121 Table 1. Heterologous expression of *S. eubayanus* *MALT* genes.

| Strain    | Background              | Transporter    | Initial OD     | Day 3          | Day 6          |
|-----------|-------------------------|----------------|----------------|----------------|----------------|
| yHRVM108* | North Carolinian strain | -              | 0.16 (+/-0.05) | 0.39 (+/-0.02) | 0.48 (+/-0.01) |
| yHRVM108  | North Carolinian strain | -              | 0.12 (+/-0.03) | 0.47 (+/-0.00) | 0.46 (+/-0.03) |
| yHEB1870  | yHRVM108                | <i>MALT1</i>   | 0.13 (+/-0.03) | 0.43 (+/-0.04) | 0.58 (+/-0.04) |
| yHEB1877  | yHRVM108                | <i>MALT2/4</i> | 0.11 (+/-0.00) | 0.39 (+/-0.01) | 0.57 (+/-0.02) |
| yHEB1872  | yHRVM108                | <i>MALT3</i>   | 0.13 (+/-0.01) | 0.41 (+/-0.00) | 0.62 (+/-0.5)  |
| yHEB1883  | yHRVM108                | <i>ncAGT1</i>  | 0.11 (+/-0.01) | 0.54 (+/-0.07) | 1.34 (+/-0.10) |
| yHEB1884  | yHRVM108                | <i>lgAGT1</i>  | 0.10 (+/-0.00) | 0.42 (+/-0.07) | 0.94 (+/-0.09) |

122 Growth on SC + 2% maltotriose (98% pure) of strains expressing *MALT* genes on a doxycycline-inducible  
 123 plasmid. N = 3, standard deviation in parentheses. \* Control grown in SC + 0.04% glucose + doxycycline  
 124 to reflect the approximate amount of growth expected from contamination with other carbon sources  
 125 when using 98% pure maltotriose.

126 Although none of the transporters found in the type strain of *S. eubayanus* were able to support  
 127 growth on maltotriose, there is compelling evidence from lager-brewing yeasts for the existence of  
 128 maltotriose transporters within the greater *S. eubayanus* population (28,54–57). Of particular interest  
 129 are alleles of *AGT1*. Two versions of *AGT1* are present in the genomes of lager-brewing yeasts. One,  
 130 which we call *scAGT1* (*S. cerevisiae-AGT1*), was donated by the *S. cerevisiae* parent of lager yeasts, and  
 131 the other, which we call *lgAGT1* (lager-*AGT1*), has been proposed to be of *S. eubayanus* origin (55). Both  
 132 *lgAGT1* and *scAGT1*, like other *AGT1* alleles, can transport both maltose and maltotriose (27,28,57,60–  
 133 63). Thus far, full-length sequences closely related to this *lgAGT1* have not been described in any strain  
 134 of *S. eubayanus* (36).

135 Strain CDFM21L.1 and a closely related strain isolated from North Carolina, yHRVM108, belong  
 136 to the Holarctic subpopulation of *S. eubayanus* and are close relatives of the strains of *S. eubayanus* that

137 hybridized with *S. cerevisiae* to form lager-brewing yeasts (52). Because of their close phylogenetic  
138 relationship, CDFM21L.1, yHRVM108, and the *S. eubayanus* lager parent are more likely to share strain-  
139 specific genes, such as *IgAGT1* (64). From a search of Illumina sequencing reads available for CDFM21L.1  
140 and yHRVM108, we were able to assemble two full-length genes with high sequence identity to *IgAGT1*,  
141 which we designated *tbAGT1* and *ncAGT1*, for Tibetan-*AGT1* and North Carolinian-*AGT1*, respectively  
142 (Fig 1).

143 Two single nucleotide polymorphisms (SNPs) separate *tbAGT1* and *IgAGT1*. One SNP results in a  
144 synonymous substitution and the other in a nonsynonymous substitution near the N-terminus of the  
145 protein outside of any predicted transmembrane domains (Fig 1B and C, S1 Fig). Analyses of the  
146 predicted effect of this substitution in *IgAGT1* (using STRUM and SIFT mutant protein prediction  
147 software (65,66)) suggest that it is unlikely to significantly impact protein structure or function (S1  
148 Table). In contrast, *ncAGT1* has 95% nucleotide identity with *IgAGT1*, with nonsynonymous differences  
149 distributed throughout the sequence (Fig 1A-C). Despite the presence of *ncAGT1*, the yHRVM108 wild-  
150 type strain grows poorly on maltose and is unable to grow on maltotriose. Interestingly, and unlike all  
151 *MALT* genes found in the Patagonian type strain of *S. eubayanus*, overexpression of *ncAGT1* in  
152 yHRVM108 conferred growth on maltotriose, similar to the known maltotriose transporter gene *IgAGT1*  
153 (Table 1). These results suggest that insufficient *ncAGT1* gene expression, rather than protein function, is  
154 likely the main reason for the inability of yHRVM108 to grow on maltotriose.

### 155 **Phylogenetic relationships among maltose and maltotriose transporters**

156 To put the relationship between *S. eubayanus*, *S. cerevisiae*, and lager *MALT* genes into a  
157 phylogenetic perspective, a gene tree was constructed for these three groups of genes (Fig 2).  
158 Consistent with previous analyses of *MALT* genes in *Saccharomyces* (30), the *MALT* genes fell into 3  
159 major clades. The *AGT1* genes formed their own group, significantly divergent from the other clades and  
160 was further split between the *AGT1* genes originating from *S. cerevisiae* and the *AGT1* genes originating



161 from *S. eubayanus*. *MPH* genes, which are native to *S. cerevisiae* but also present in some lager yeasts  
162 (63,67), also formed their own clade. *MPH* genes are most often described as encoding maltose  
163 transporters, but their ability to transport maltotriose is still uncertain (30,63,67–69). The final and  
164 largest clade was made up of *MALT1-4* from *S. eubayanus*, *MALx1* genes from *S. cerevisiae*, and the  
165 lager-specific gene *MTT1* (28,29,54). This clade was further subdivided into a group containing only *S.*  
166 *eubayanus* *MALT* genes and their close lager homologs and another group consisting of *MALx1* genes,  
167 *MTT1*, and *MALT3*. Within this clade, genes encoding maltotriose transporters were rare, represented  
168 by only a single gene, *MTT1* (28,29). The phylogenetic distribution of maltotriose utilization suggests  
169 that the ability to transport maltotriose may be a difficult function for genes within this clade to evolve.

#### 170 **Indirect evolution of maltotriose consumption**

171 Since yHRVM108 contains a functional maltotriose transporter whose overexpression is  
172 sufficient for growth on maltotriose (Table 1), we anticipated that it would be simple for yHRVM108 to  
173 evolve the ability to utilize maltotriose under direct selection for this trait. Because yHRVM108 is unable  
174 to grow on maltotriose, we passaged the strain in 2% maltotriose medium with a small amount of added  
175 glucose to permit a limited number of cell divisions to allow for mutation and selection to occur. Over  
176 the course of 100 passages under this selection regime, representing around 1,050 cell divisions across  
177 three experimental replicates, no maltotriose-utilizing lineage of yHRVM108 arose.

178 While evolving yHRVM108 directly for maltotriose consumption was not successful, we were  
179 initially surprised to find an alternative and indirect selection regime was effective at evolving  
180 maltotriose utilization in this background. When we began adaptive evolution of yHRVM108 on  
181 maltotriose, we also began selecting for increased growth of yHRVM108 on maltose to try and improve  
182 this strain's sluggish growth on this carbon source. All three replicates of this experiment eventually  
183 evolved the ability to grow rapidly on maltose. Interestingly, in addition to growing on maltose four  
184 times more rapidly over two days (S2 Table), single-colony isolates from the first two replicates that

185 evolved rapid maltose utilization also gained the ability to utilize maltotriose (S3 Table), despite never  
186 being exposed to maltotriose during the course of the adaptive evolution experiment. The fact that  
187 maltotriose consumption independently evolved during selection for improved maltose utilization  
188 multiple times, most likely through increased expression of *ncAGT1*, suggests that our maltotriose  
189 selection regime itself may have played a role in restraining evolution.

190         Though we found the difficulty of evolving expression of a functional transporter surprising,  
191 such a result is not unprecedented. In a long-term evolution experiment in *Escherichia coli*, a functioning  
192 citrate transporter was present in the founding strain. Though expression of this gene would have been  
193 highly favored in the citrate-rich experimental environment, it took thousands of generations, even after  
194 the necessary potentiating mutations had appeared, before a gene amplification and rearrangement  
195 event joined the citrate transporter gene to a new promoter, resulting in a novel expression pattern  
196 (70). These results show how an organism's preexisting genetic architecture, interacting with the  
197 selective environment, can facilitate or impede evolution along a particular path (71–74). Since maltose  
198 is consumed to some extent by yHRVM108, loosened regulation of *ncAGT1* might have been selected for  
199 alongside other *MAL* genes because *AGT1*-type transporters have a broad substrate range that includes  
200 maltose (30). In contrast, evolving maltotriose utilization directly might have required specific and rare  
201 changes to the *ncAGT1* locus itself. In retrospect, what appeared to be a simple request, to turn on the  
202 *ncAGT1* gene in the presence of maltotriose as the sole carbon source, may in fact have been quite  
203 difficult by simple mutations, whereas our indirect selection regime on maltose proved more effective.

#### 204 **Evolution of maltotriose utilization through a chimeric transporter**

205         To determine how strains lacking any maltotriose transporters could evolve them, we also tried  
206 to experimentally evolve maltotriose utilization in the *S. eubayanus* strains FM1318 (48) and in yHKS210  
207 (53). A search of the available genome sequence reads for FM1318 (54,59) and yHKS210 (52) confirmed  
208 that neither of these strains contain genes that are closely related to *AGT1*-like genes or other known

209 maltotriose transporters (28,29). Based on our analysis of the available whole-genome sequencing data,  
210 these strains only contain the four *MALT* transporter genes previously identified in FM1318 (54), which  
211 are unable to confer maltotriose utilization even when overexpressed (Table 1). Since, like yHRVM108,  
212 neither of these strains could grow on maltotriose, a small amount of glucose was also added to the  
213 medium to permit a limited number of cell divisions for mutation and selection. Over the course of 100  
214 passages, representing approximately 2,100 cell divisions in total between the two strains and their  
215 replicates, a single replicate, derived from strain yHKS210, evolved the ability to grow on maltotriose.  
216 Two single-colony isolates (yHEB1505-6) from this replicate were isolated and confirmed to be able to  
217 grow on maltotriose without added glucose (Fig 3A, S3 Table).

218 To determine the genetic architecture of maltotriose utilization in the replicate of yHKS210 that  
219 evolved the ability to grow on maltotriose, we set up an  $F_1$  backcross between the evolved maltotriose-  
220 utilizing isolate yHEB1505 and the parent strain (yHKS210), producing strain yHEB1593, a putative  
221 heterozygote capable of growth on maltotriose (Fig 3B and E). In a test of 15 fully viable  $F_2$  tetrads,  
222 maltotriose utilization segregated in a perfect 2:2 manner (Fig 3C). These results suggest that the ability  
223 of the evolved strain to utilize maltotriose is conferred by a dominant mutation at a single genetic locus.  
224 We performed bulk segregant analysis (75–77) using strains derived from the  $F_2$  spores, dividing them  
225 between those that could (MalTri+) and those that could not (MalTri-) utilize maltotriose (Fig 3C), with a  
226 total of 30 strains in each category. Twelve 1-kb regions were identified as potentially containing fixed  
227 differences between the MalTri+ and MalTri- strains. Of these regions, eight mapped to genes encoding  
228 ribosomal proteins and most likely represent assembly artefacts due to the presence of many closely  
229 related paralogs and/or their absence from the MalTri- de novo assembly that was used for  
230 comparisons. Three other regions contained fixed differences between the MalTri+ and MalTri- groups  
231 but had no clear relationship to carbon metabolism. The final 1-kb region mapped to the *MALT4* locus of  
232 *S. eubayanus* genome (54,59). The coding sequence of *MALT4* from the MalTri+ group contained 52

233 SNPs relative to the *MALT4* allele found in yHKS210, all of which occurred within a single 230-bp region.  
234 Of these, 11 were predicted to lead to non-synonymous changes. Closer inspection revealed that the  
235 changes within the 230-bp region were the result of a recombination event between *MALT4* and *MALT3*,  
236 creating a chimeric gene (Fig 4), likely through ectopic gene conversion. We call this chimeric *MALT4*  
237 allele *MALT434* after the arrangement of sequences from its parent genes. The sequence of *MALT3* was  
238 not impacted by this mutational event.

239 To confirm that *MALT434* was the causative locus of maltotriose utilization, we performed a  
240 reciprocal hemizyosity test (78) in the heterozygous F<sub>1</sub> backcross strain (Fig 3D). Removal of *MALT434*  
241 eliminated the F<sub>1</sub> backcross strain's ability to utilize maltotriose (Fig 3E), demonstrating that *MALT434* is  
242 required for maltotriose utilization. Conversely, removing the parental, non-chimeric allele of *MALT4* in  
243 the heterozygous F<sub>1</sub> backcross strain had no impact on maltotriose utilization. Furthermore,  
244 overexpression of Malt434 in both the unevolved parent, yHKS210, and in the yHRVM108 background  
245 (Fig 5) supported growth on maltotriose, demonstrating that overexpression of Malt434 is sufficient to  
246 confer maltotriose utilization. These results strongly suggest that the mutant *MALT434* gene encodes a  
247 functional maltotriose transporter.

#### 248 **Potential structural impact of Malt434 chimerism**

249 It was surprising that sequences from *MALT3* enabled *MALT4* to encode a maltotriose  
250 transporter because neither *MALT3* nor *MALT4* supported maltotriose utilization on their own (Table 1).  
251 Malt3 and Malt4 share about 80% amino acid identity overall and 85% amino acid identity in the  
252 chimeric region specifically (Fig 4B). Most residues in the chimeric region had high similarity between  
253 Malt3 and Malt4, as measured by Blosum62 similarity matrix (Fig 4C) (79), but there were a handful of  
254 low-similarity amino acids as well. To gain insight into what changes in protein structure may be driving  
255 the new functionality of Malt434, we used I-TASSER (80–82) to predict the protein structure of Malt3,  
256 Malt4, and Malt434. I-TASSER predicts a protein's structure based on its homology to proteins whose

257 structures have already been solved. Consistent with other studies on the structure of maltose  
258 transporters in *Saccharomyces* (27,83–85), I-TASSER predicted that Malt3, Malt4, and Malt434 were  
259 similar to members of the Major Facilitator Superfamily (MFS) of transporters, specifically the sugar  
260 porter family (85). Protein structure is predicted to be conserved between Malt3 and Malt4, including  
261 within the chimeric region, which encompasses one full transmembrane domain and parts of two other  
262 transmembrane domains (Fig 4D). Four maltose-binding sites were also predicted in the chimeric region.  
263 These same domains and predicted binding residues were predicted for Malt434 as well. Interestingly, I-  
264 TASSER predicted several of the alpha helices to be shorter in the chimera relative to the parent  
265 proteins: two alpha helices in the chimeric region and two towards the N-terminal end of the protein  
266 (Fig 4D, S1 Fig). The regions covered by these alpha helices were otherwise predicted to be conserved,  
267 out to phylogenetically distantly related Malt proteins IgAgt1 and scAgt1 (Fig 2, Fig 4D, S1 Fig). The  
268 predicted shortening of some alpha helices suggests that recombining the *MALT3* region into *MALT4*  
269 may have decreased the overall rigidity of the encoded chimeric protein, allowing it to accommodate  
270 bulkier substrates, such as maltotriose. Mutations that increase structural flexibility have been  
271 recognized in protein engineering as an important step in accommodating new substrates (86,87).

272       Besides increasing overall flexibility, the specific location of the chimeric region could have also  
273 played a role in supporting maltotriose transport. A previous study found that two residues were  
274 important for scAgt1's ability to transport maltotriose, while not affecting its ability to transport maltose  
275 (44). One of these residues lies within the chimeric region of Malt434, and the other is 10 amino acids  
276 downstream (Fig 4D, S1 Fig). Since the overall structure of maltose/maltotriose transporters is  
277 conserved (27,83–85), the area in and around the chimeric region of Malt434 may itself be important for  
278 substrate specificity.

279       Thus, the chimeric structure of Malt434 may have facilitated maltotriose transport in two ways.  
280 First, it may have increased the overall flexibility of the protein, allowing it to accommodate the larger

281 maltotriose molecule. Second, it could also have specifically altered an important substrate interface to  
282 facilitate a better interaction with maltotriose, possibly also by making this region more flexible. Testing  
283 these biophysical and structural models will require future experiments, such as solving the crystal  
284 structures for Malt3, Malt4, and Malt434 as complexes with maltose and/or maltotriose.

### 285 **A non-modular chimeric path to novel substrate utilization**

286 Most of the work on functional innovations by chimeric proteins has focused on the  
287 rearrangement of discrete functional units, with or without the benefit of intronic sequences (6,7,14,88–  
288 91). However, Malt434 does not fit easily into the framework of new protein creation by the  
289 reordering/exchanging of modules, even when considering smaller functional units such as a single  
290 alpha helix. While the chimeric region does completely move one alpha helix from Malt3 into the Malt4  
291 background, the breakpoints of the gene conversion also result in two other alpha helices with some  
292 residues from the Malt4 parent and some from the Malt3 parent, creating chimeric alpha helices (Fig  
293 4D, S1 Fig). In addition, while domains important for sugar specificity probably exist in Malt3 and Malt4  
294 (44,84), with respect to maltotriose, the “sugar specificity” domain(s) between Malt3 and Malt4 do not  
295 seem to have different functions or specificities in their native backgrounds. In Malt3 and Malt4, there  
296 are no specific “maltotriose-transporting” domains to be swapped. Instead, the ability of the residues  
297 from Malt3 to facilitate maltotriose transport likely relies on their interaction with one or more residues  
298 in Malt4, not on their independent ability to interact with maltotriose.

299 Rather than the modular framework of novel protein formation, Malt434 exemplifies another  
300 framework for how recombination can lead to the evolution of novel functions. Theoretical and  
301 experimental work has demonstrated the important role that recombination between related proteins  
302 can play in facilitating the evolution of new functions (3,4,15,92). Indeed, protein engineering has  
303 utilized the technique of DNA shuffling since the mid-1990’s to recombine closely related coding  
304 sequences to efficiently generate proteins with novel or improved functions (19). More recently,

305 experimental work has begun to demonstrate the importance of recombination between closely related  
306 proteins in nature for the evolution of new functions (15,18,92). In this model, two duplicate proteins  
307 neutrally accumulate the multiple amino acid changes needed for a new function independently. All of  
308 the mutations that are needed for the new function are then brought together at once, en masse,  
309 through recombination. This molecular mechanism allows proteins to “tunnel” to new functions,  
310 bypassing potentially deleterious intermediates that would be encountered through a series of amino  
311 acid substitutions (3,4).

312 While *MALT3* and *MALT4* are not recent duplicates, they are distant paralogs (Fig 2). In addition,  
313 as members of the sugar porter subfamily of proteins, they share a highly conserved protein structure  
314 (27,83–85). The conservative nature of sugar porter family proteins means that recombination events  
315 like the one that formed Malt434, which do not fall between clear domains, probably have a relatively  
316 high likelihood of creating functional transporters (93), albeit ones of unpredictable specificity. In the  
317 case of Malt434, we do not yet know which specific amino acid interactions were important for the gain  
318 of maltotriose utilization in the chimera, let alone the function or history of the residues in the  
319 background of their native protein sequences. It may be that they represent neutral changes in their  
320 parental backgrounds, but they also could have been selected for other specificities. Nevertheless, the  
321 independent accumulation of these changes in a common ancestral protein background eventually  
322 allowed these sequences to recombine and create a novel function.

### 323 **Conclusions**

324 Our findings suggest that the evolution of maltotriose utilization by *Saccharomyces* yeasts is not  
325 a straightforward process. Even when a functioning maltotriose transporter is available in the parent  
326 genome, the regulatory changes necessary to support atypical expression may be difficult to evolve  
327 under certain experimental conditions. Conversely, when a maltotriose transporter is not already  
328 present, single point mutations are probably insufficient to switch or expand the specificity of available

329 Malt proteins. Recombination between paralogous proteins can rapidly do what a single point mutation  
330 cannot and, in a single rare mutational event, introduce the multiple residue changes needed to perform  
331 a new function. Our report on the evolution of a chimeric maltotriose transporter from parental  
332 proteins that could not transport maltotriose supports the role of recombination, beyond the simple  
333 swapping of functional protein domains and peptide motifs, in the formation of proteins with novel  
334 functions.

## 335 **Materials and Methods**

### 336 **Strains**

337 All strains discussed in this paper are listed in S4 Table. Briefly, FM1318 is a monosporic  
338 derivative of the type strain of *S. eubayanus*, which was isolated from Patagonia (48). yHRVM108 was  
339 isolated from Durham, North Carolina, and is closely related to the *S. eubayanus* strains that hybridized  
340 with *S. cerevisiae* to give rise to lager-brewing yeasts (52). yHKS210 was isolated from Sheboygan,  
341 Wisconsin, and is the result of admixture between populations A and B of *S. eubayanus*. yHKS210 is  
342 nearly homozygous due to selfing after the initial admixture event (53). Of these strains, FM1318 and  
343 yHKS210 grew well on maltose, but they did not grow on maltotriose. yHRVM108 grew sluggishly on  
344 maltose and did not grow on maltotriose. yHAB47 is a copy of Weihenstephan 34/70 (52), a  
345 representative of the Froberg or Group II (94) lineage of lager-brewing hybrids (*S. cerevisiae* (2n) x *S.*  
346 *eubayanus* (2n) (58)). CDFM21L.1 is a strain of *S. eubayanus* isolated from Tibet (51) and is closely  
347 related to yHRVM108. Of known *S. eubayanus* strains, CDFM21L.1 is the most genetically similar to the  
348 *S. eubayanus* parents of lager-brewing hybrids (51,52).

### 349 **Identification of *MALT* genes**

350 Previously, we identified four genes with homology to genes encoding maltose transporters in *S.*  
351 *cerevisiae* and lager-brewing hybrids in the genome assembly of FM1318 published by Baker *et al.* 2015



352 (54). These genes were previously designated *MALT1-4*. Only a partial contig was available for *MALT4* in  
353 this assembly, but a BLAST (95) search of the Okuno *et al.* 2016 (59) assembly of the type strain of *S.*  
354 *eubayanus* (of which FM1318 is a monosporic derivative) allowed us to annotate the full-length  
355 sequence of *MALT4*. *MALT4* has 99.7% identity to *MALT2* at the nucleotide level and is predicted to have  
356 100% identity at the amino acid level. The regions from 900 bp downstream of *MALT2* and *MALT4* and  
357 upstream to the ends of chromosomes V and XVI (regions of approximately 12 kb in the Okuno *et al.*  
358 2016 (59) assembly), respectively, share 99.1% nucleotide identity. The 10 kb outside of this region only  
359 share 49.8% nucleotide identity. Thus, *MALT2* and *MALT4* are close paralogs that are likely related by a  
360 recent subtelomeric duplication and/or translocation event.

361 Reads for homologs of *AGT1* were retrieved using the functional *AGT1* sequence from lager  
362 yeast (*lgAGT1*) as the query sequence (55) in an SRA-BLAST search of the SRA databases of NCBI for  
363 yHRVM108 (SRR2586159) and CDFM21L.1 (SRR1507225). All reads identified in the BLAST searches were  
364 downloaded and assembled using the de novo assembler in Geneious v. 9.0.3  
365 (<http://www.geneious.com>) (96). The homologs identified in yHRVM108 and CDFM21L.1 were  
366 designated *ncAGT1* (for North Carolinian *AGT1*) and *tbAGT1* (for Tibetan *AGT1*), respectively. The  
367 presence and sequence of *ncAGT1* in yHRVM108 was further verified by PCR amplification and Sanger  
368 sequencing (S5 Table). CDFM21L.1 was not available at the time of this work for further verification of  
369 the presence of *tbAGT1*.

## 370 **Adaptive evolution**

371 Design of the adaptive evolution experiments was based on Parreiras *et al.* 2014 (97). The  
372 highest available purities of carbon sources were used: 98% pure maltotriose, ≥99% pure maltose, and  
373 100.0% pure glucose. Adaptive evolution was initiated by growing parent strains overnight in liquid YPD  
374 medium (1% yeast extract, 2% peptone, 2% glucose). One mL of maltotriose or maltose medium was  
375 inoculated with enough overnight culture to give an OD<sub>600</sub> reading of ~0.1, as measured with an IMPLN

376 OD600 DiluPhotometer™. Evolution on maltotriose was conducted in synthetic complete (SC) medium  
377 (0.17% yeast nitrogen base, 0.5% ammonium sulfate, 0.2% complete drop out mix) with 2% maltotriose  
378 and 0.1% glucose. The addition of 0.1% glucose ensured enough growth that mutations could occur and  
379 be selected for through the ensuing generations. Adaptive evolution of yHRVM108 on maltose was  
380 carried out in SC with 2% maltose. Because yHRVM108 grew so poorly on maltose alone, an additional  
381 0.1% glucose was supplemented into its medium; after increased growth was observed around  
382 generation 110 for replicate A (from which strains yHEB1585-1587 were derived), around generation 80  
383 for replicate B (from which strains yHEB1588-90 were derived), and around generation 155 for replicate  
384 C (from which strains yHEB1778-80 were derived), subsequent generations of yHRVM108 adaptive  
385 evolution on maltose for these replicates were conducted with 2% maltose only. Adaptive evolution  
386 experiments of each strain were carried out in triplicate. Samples were grown on a culture wheel at  
387 room temperature (22°C) and diluted 1:10 into fresh media every 3-4 days. Samples of each evolution  
388 replicate were taken every other passage and placed into long-term storage by mixing 700uL of culture  
389 with 300uL of 50% glycerol in a cryotube and storing it at -80°C. The numbers of doublings between  
390 passages were estimated from cell counts during the second and third passages. Evolution was carried  
391 out for a total of 100 passages. Strains that could not use the primary carbon source in the adaptive  
392 evolution medium underwent approximately one cell division per day on average.

### 393 **Sporulation and backcrossing**

394 To induce sporulation, strains were grown to saturation, washed twice, and then resuspended in  
395 200µL liquid sporulation (spo) medium (1% potassium acetate, 0.5% zinc acetate). 30µL of this  
396 suspension was added to 1.5mL of spo medium and incubated on a culture wheel at room temperature.  
397 Cultures were checked for sporulation after 2-5 days. Tetrads were dissected using a Singer SporePlay.  
398 For backcrossing, tetrads of the strains to be crossed were dissected on a single YPD plate. A spore from  
399 one parent was placed in close proximity to a spore from the other parent, and they were observed over

400 several hours for mating and zygote formation. Transformations of the diploid F<sub>1</sub> backcross strain for  
401 gene knockouts were carried out as described below in the section describing the construction of gene  
402 expression plasmids.

### 403 **Construction of gene expression plasmids**

404 Genes encoding transporters of interest were cloned via gap repair into the *NotI* site of plasmid  
405 pBM5155 (GenBank KT725394.1), which contains the complete machinery necessary for doxycycline-  
406 based induction of genes cloned into this site (98). Transformation was carried out using standard  
407 lithium acetate transformation (99) with modifications to optimize transformation in *S. eubayanus*.  
408 Specifically, transformation reactions were heat-shocked at 34°C. After 55 minutes, 100% ethanol was  
409 added to 10% total volume, and the reactions heat shocked for another 5 minutes before they were  
410 allowed to recover overnight and plated to selective media the next day. When necessary, plasmids  
411 were recovered and amplified in *E. coli* for transformation into multiple strains. The sequences of genes  
412 encoding transporters cloned into pBM5155 were verified by Sanger sequencing. *S. eubayanus* *MALT1*,  
413 *MALT3*, and *MALT4* were amplified from FM1318, *IgAGT* was amplified from yHAB47, and *ncAGT1* was  
414 amplified from yHRVM108. Primers used for plasmid construction and sequence verification are listed in  
415 S5 Table.

### 416 **Growth assays**

417 Growth was measured in liquid media in 96-well plates using OD<sub>600</sub> measurements on a  
418 FLUOstar Omega<sup>®</sup> microplate reader. Strains were first grown to saturation in liquid YPD medium, then  
419 washed twice and diluted in SC without added carbon to OD<sub>600</sub> = 1.9 +/- 0.05 to ensure that all cultures  
420 had approximately the same starting concentration. 15µL of each diluted culture was added to 235µL of  
421 the test medium. Three technical replicates, randomly distributed on a 96-well plate to control for  
422 position effects, were carried out for each strain. Single-colony isolates of yHKS210 evolved on  
423 maltotriose and single-colony isolates of yHRVM108 evolved on maltose were tested in SC medium + 2%

424 maltotriose. Single-colony isolates of yHRVM108 evolved on maltose were also tested on SC medium +  
425 2% maltose. Strains carrying *MALT* genes expressed on an inducible plasmid were tested in SC medium +  
426 2% maltotriose and 5 ng/mL doxycycline to induce plasmid gene expression. To control for growth from  
427 the small amount of non-maltotriose sugar in 98% pure maltotriose, the parent strains of yHRVM108  
428 and yHKS210 were also tested in SC medium + 0.04% glucose, reflecting the approximate amount of  
429 other carbon sources expected in SC medium + 2% maltotriose.

### 430 **Bulk segregant analysis**

431 60 spores from 15 fully viable tetrads of strain yHEB1593 ( $F_1$  of yHKS210 x yHEB1505) were  
432 dissected and individually screened for their ability to grow in SC + 2% maltotriose.  $F_2$  segregants that  
433 could grow on maltotriose were classified as MalTri+, and those that could not were classified as MalTri-  
434 . Each  $F_2$  segregant was then individually grown to saturation in liquid YPD. The saturated cultures were  
435 spun down, the supernatant removed, and enough cells resuspended in liquid SC medium to give an  
436  $OD_{600}$  measurement of between 1.9 and 1.95, as measured with an IMPLEN OD600 DiluPhotometer™.  
437 Strains were pooled based on their ability to grow on maltotriose, forming a MalTri+ pool and a MalTri-  
438 pool. To pool, 1mL of each strain dilution was added to the appropriate pool of cells and vortexed to  
439 mix. Phenol-chloroform extraction and ethanol precipitation was used to isolate gDNA from the  
440 segregant pools. The gDNA was sonicated and ligated to Illumina TruSeq-style dual adapters and index  
441 sequencing primers using the NEBNext® DNA Library Prep Master Mix Set for Illumina® kit following the  
442 manufacturer's instructions. The paired-end libraries were sequenced on an Illumina MiSeq instrument,  
443 conducting a 2 x 250bp run.

### 444 **Analysis of bulk segregant sequencing reads**

445 To identify fixed differences between the meiotic segregant pools, de novo assemblies were  
446 made for the MalTri- group of segregants using the meta-assembler iWGS with default settings (100).  
447 The final genome assembly of the MalTri- pool was made by DISCOVAR (101) in iWGS. This assembly was

448 used for reference-based genome assembly and variant calling using reads from the MalTri+ pool  
449 following the protocol described in Peris and Langdon *et al.* 2016 (52). Assemblies of the putative  
450 chimeric maltotriose transporter were retrieved from the MalTri+ pool of reads using the program  
451 HybPiper (102). Briefly, HybPiper uses a BLAST search of read sequences to find reads that map to a  
452 query sequence; it then uses the programs Exonerate (103) and SPAdes (104) to assemble the reads into  
453 contigs. The sequence and genomic location of the chimeric transporter were further verified by PCR  
454 amplification and Sanger sequencing (S5 Table), as was the sequence of *MALT4* from yHKS210.

### 455 **Phylogenetic analyses and computational predictions of protein structures and functions**

456 Multiple sequence alignments between the proteins encoded by the *MALT* genes were carried  
457 out using MUSCLE (105), as implemented in Geneious v.9.0.3 (96) (<http://www.geneious.com>).  
458 Phylogenetic relationships were determined using codon alignments. Codon alignments were made  
459 using PAL2NAL (Suyama, Torrents, & Bork, 2006; <http://www.bork.embl.de/pal2nal/>) to convert the  
460 MUSCLE alignments of amino acid sequences to nucleotide alignments. A phylogenetic tree of nineteen  
461 *MALT* genes from *S. eubayanus* and *S. cerevisiae* and lager-brewing yeasts was constructed as described  
462 in Baker *et al.* 2015 (54) using MEGA v.6. Most genes used in the phylogenetic analysis were retrieved as  
463 previously described in Baker *et al.* 2015 (54) as follows: *MAL21*, *MAL31*, and *MAL61* from *S. cerevisiae*;  
464 *MALT1* and *MALT3* from *S. eubayanus*; *MALT1*, *MALT2*, and *MPH* from lager-brewing yeast; *MPH2* and  
465 *MPH3* from *S. cerevisiae*; *AGT1* (*MAL11* in Baker *et al.* 2015 (54)) from *S. cerevisiae*; *scAGT1*  
466 (*WeihenMAL11*-CB in Baker *et al.* 2015 (54)); and *IgAGT1* (*WeihenMAL11*-CA in Baker *et al.* 2015 (54))  
467 Sequences for *MALT2* and *MALT4* were retrieved from the genome assembly of CBS 12357<sup>T</sup> from Okuno  
468 *et al.* 2016 (59). *MAL11* was retrieved from the genome assembly of *S. cerevisiae* strain YJM456 (107).  
469 Sequences for *tbAGT1* and *ncAGT1* were retrieved as described above. *MAL11* and *AGT1* both encode  $\alpha$ -  
470 glucoside transporters located at the *MAL1* locus in *S. cerevisiae* and, as such, are considered alleles of  
471 each other (27,108). Their shared genomic location notwithstanding, *MAL11* and *AGT1* are not

472 phylogenetically closely related, with *MAL11* clustering with other *MALx1* type transporters (Fig 2). In  
473 addition, while *AGT1* can support maltotriose transport, *MAL11*, like other known *MALx1* genes, cannot  
474 (27,30). Despite their dissimilarity, *AGT1* is recorded in the *Saccharomyces* Genome Database  
475 (yeastgenome.org) as *MAL11* since the reference strain carries the *AGT1* allele at the *MAL1* locus  
476 (60,63). For this reason, *MAL11* is often used to refer to *AGT1* (30,32,54). For clarity, here we use *MAL11*  
477 to only refer to the *MALx1*-like allele and *AGT1* to refer to the distinct maltotriose-transporting allele.

478 Protein structure predictions for *MALT3*, *MALT4*, *IgAGT1*, and *scAGT1* were carried out using the  
479 I-TASSER server, and the structure prediction of *MALT434* was carried out using the command line  
480 version of I-TASSER (80–82) (<https://zhanglab.ccmb.med.umich.edu/I-TASSER/>, accessed between 2-7-  
481 2018 and 2-28-2018). The potential impact of the single residue difference between *IgAGT1* and *tbAGT1*  
482 was analyzed by two different methods. Prediction of the change in free energy ( $\Delta\Delta G$ ) was carried out  
483 using the STRUM server (<https://zhanglab.ccmb.med.umich.edu/STRUM/>, accessed 3-21-18) (65). A  
484  $\Delta\Delta G$  score of  $< +/- 0.5$  was considered to be unlikely to affect function (109). Homology-based  
485 predictions were made using SIFT at <http://sift.jcvi.org/> (accessed 3-30-18) (66,110–113). The SIFT  
486 Related Sequences analysis was done using the amino acid sequences of *MALT* genes in the  
487 phylogenetic analysis above. Several SIFT analyses were also carried out using the SIFT Sequence  
488 analysis program. This analysis operates using the same principle as the SIFT Related Sequences analysis,  
489 but rather than being supplied by the user, homologous sequences were provided by a PSI-BLAST search  
490 of the indicated protein database. The SIFT Sequence analyses were carried out using default settings  
491 and the following databases available on <http://sift.jcvi.org/> (accessed 3-30-18): NCBI nonredundant  
492 2011 Mar, UniRef90 2011 Apr, UniProt-SwissProt 57.15 2011 Apr.

## 493 **Acknowledgments**

494 We thank Dana A. Opulente, Quinn K. Langdon, Ryan V. Moriarty, and Kelly V. Buh for their assistance  
495 maintaining the experimental evolution lines described in this manuscript.

## 496 **Conflicts of interest**

497 I have read the journal's policy and the authors of this manuscript have the following competing  
498 interests: EB and CTH, together with the Wisconsin Alumni Research Foundation, have filed a provisional  
499 patent application entitled, "POLYPEPTIDE AND YEAST CELL COMPOSITIONS AND METHODS OF USING  
500 THE SAME." All strains and constructs are freely available for non-commercial research.

## 501 **Financial Disclosure**

502 This work was supported by the USDA National Institute of Food and Agriculture, Hatch project  
503 1003258, the National Science Foundation (grant numbers DEB-1253634); and funded in part by the  
504 DOE Great Lakes Bioenergy Research Center (DOE BER Office of Science DE-SC0018409 and DE-FC02-  
505 07ER64494). EB is supported by a Louis and Elsa Thomsen Wisconsin Distinguished Graduate Fellowship.  
506 CTH is a Pew Scholar in the Biomedical Sciences and a Vilas Faculty Early Career Investigator, supported  
507 by the Pew Charitable Trusts and the Vilas Trust Estate. The funders had no role in study design, data  
508 collection and analysis, decision to publish, or preparation of the manuscript.

## 509 **References**

- 510 1. Long M, Betrán E, Thornton K, Wang W. The origin of new genes: glimpses from the young and  
511 old. *Nat Rev Genet.* 2003;4(11):865–75. pmid:14634634
- 512 2. Ohno S. *Evolution by Gene Duplication.* Berlin, Heidelberg: Springer Berlin Heidelberg; 1970.
- 513 3. Bittihn P, Tsimring LS. Gene Conversion Facilitates Adaptive Evolution on Rugged Fitness  
514 Landscapes. *Genetics.* 2017;207(4):1577–89. pmid:28978673
- 515 4. Cui Y, Wong WH, Bornberg-Bauer E, Chan HS. Recombinatoric exploration of novel folded  
516 structures: a heteropolymer-based model of protein evolutionary landscapes. *Proc Natl Acad Sci*  
517 *U S A.* 2002;99(2):809–14. pmid:11805332
- 518 5. Poelwijk FJ, Kiviet DJ, Weinreich DM, Tans SJ. Empirical fitness landscapes reveal accessible  
519 evolutionary paths. *Nature.* 2007;445(7126):383–6.
- 520 6. Patthy L. Genome evolution and the evolution of exon-shuffling — a review. *Gene.*  
521 1999;238(1):103–14. pmid:10570989
- 522 7. Patthy L. Modular Assembly of Genes and the Evolution of New Functions. *Genetica.* 2003;118(2–

- 523 3):217–31. pmid:12868611
- 524 8. Henikoff S, Greene EA, Pietrokovski S, Bork P, Attwood TK, Hood L. Gene families: the taxonomy  
525 of protein paralogs and chimeras. *Science*. 1997;278(5338):609–14. pmid:9381171
- 526 9. Leffler EM, Band G, Busby GBJ, Kivinen K, Le QS, Clarke GM, et al. Resistance to malaria through  
527 structural variation of red blood cell invasion receptors. *Science*. 2017;356(6343):eaam6393.  
528 pmid:28522690
- 529 10. Mitelman F, Johansson B, Mertens F. The impact of translocations and gene fusions on cancer  
530 causation. *Nat Rev Cancer*. 2007;7(4):233–45. pmid:17361217
- 531 11. Rippey C, Walsh T, Gulsuner S, Brodsky M, Nord AS, Gasperini M, et al. Formation of Chimeric  
532 Genes by Copy-Number Variation as a Mutational Mechanism in Schizophrenia. *Am J Hum Genet*.  
533 2013;93(4):697–710. pmid:24094746
- 534 12. Malfavon-Borja R, Wu LI, Emerman M, Malik HS. Birth, decay, and reconstruction of an ancient  
535 TRIMCyp gene fusion in primate genomes. *Proc Natl Acad Sci U S A*. 2013;110(7):E583-92.  
536 pmid:23319649
- 537 13. Wang W, Zhang J, Alvarez C, Llopart A, Long M. The Origin of the *Jingwei* Gene and the Complex  
538 Modular Structure of Its Parental Gene, Yellow Emperor, in *Drosophila melanogaster*. *Mol Biol*  
539 *Evol*. 2000;17(9):1294–301.
- 540 14. De Chateau M, Bjorck L, Smith JM. Identification of interdomain sequences promoting the  
541 intronless evolution of a bacterial protein family. *Proc Natl Acad Sci*. 1996;93(16):8490–5.  
542 pmid:8710897
- 543 15. Rogers RL, Hartl DL. Chimeric Genes as a Source of Rapid Evolution in *Drosophila melanogaster*.  
544 *Mol Biol Evol*. 2012;29(2):517–29. pmid:21771717
- 545 16. Bogarad LD, Deem MW. A hierarchical approach to protein molecular evolution. *Proc Natl Acad*  
546 *Sci U S A*. 1999;96(6):2591–5. pmid:10077554



- 547 17. Voigt CA, Martinez C, Wang Z-G, Mayo SL, Arnold FH. Protein building blocks preserved by  
548 recombination. *Nat Struct Biol.* 2002;9(7):553–8. pmid:12042875
- 549 18. Thomas JH. Concerted evolution of two novel protein families in *Caenorhabditis* species.  
550 *Genetics.* 2006;172(4):2269–81. pmid:16415360
- 551 19. Giver L, Arnold FH. Combinatorial protein design by in vitro recombination. *Curr Opin Chem Biol.*  
552 1998;2(3):335–8. pmid:9691067
- 553 20. Cole MF, Gaucher EA. Utilizing natural diversity to evolve protein function: applications towards  
554 thermostability. *Curr Opin Chem Biol.* 2011;15(3):399–406.
- 555 21. Minshull J, Willem Stemmer PC. Protein evolution by molecular breeding. *Curr Opin Chem Biol.*  
556 1999;3(3):284–90. pmid:10359711
- 557 22. Nijland JG, Shin HY, de Waal PP, Klaassen P, Driessen AJM. Increased xylose affinity of Hxt2  
558 through gene shuffling of hexose transporters in *Saccharomyces cerevisiae*. *J Appl Microbiol.*  
559 2018 Feb;124(2):503–10. pmid:29240974
- 560 23. Eßlinger HM. Fermentation, Maturation and Storage. In: Eßlinger HM, editor. Handbook of  
561 brewing processes, technology, markets. Weinheim (Germany): Wiley-VCH; 2009. p. 209.
- 562 24. Briggs DE, Brookes PA, Stevens R, Boulton CA. Metabolism of wort by yeast. In: *Brewing: science*  
563 *and practice.* Abington Hall, Abington Cambridge CB1 6AH, England: Woodhead Publishing  
564 Limited; 2004. p. 413.
- 565 25. Briggs D.E., Brookes P.A., Stevens R. BCA. The science of mashing. In: *Brewing: science and*  
566 *practice.* Abington Hall, Abington Cambridge CB1 6AH, England: Woodhead Publishing Limited;  
567 2004. p. 108, 109, 123,125.
- 568 26. Meussdoerffer F, Zarnkow M. Starchy Raw Materials. In: Eßlinger HM, editor. Handbook of  
569 brewing processes, technology, markets. Weinheim (Germany): Wiley-VCH; 2009. p. 58.
- 570 27. Han E, Cotty F, Sottas C, Jiang H, Michels CA. Characterization of *AGT1* encoding a general

- 571  $\alpha$ -glucoside transporter from *Saccharomyces*. Mol Microbiol. 1995;17(6):1093–107.  
572 pmid:8594329
- 573 28. Dietvorst J, Londesborough J, Steensma HY. Maltotriose utilization in lager yeast strains: *MTT1*  
574 encodes a maltotriose transporter. Yeast. 2005;22(10):775–88. pmid:16088872
- 575 29. Salema-Oom M, Valadão Pinto V, Gonçalves P, Spencer-Martins I. Maltotriose utilization by  
576 industrial *Saccharomyces* strains: characterization of a new member of the alpha-glucoside  
577 transporter family. Appl Environ Microbiol. 2005;71(9):5044–9. pmid:16151085
- 578 30. Brown CA, Murray AW, Verstrepen KJ. Rapid Expansion and Functional Divergence of  
579 Subtelomeric Gene Families in Yeasts. Curr Biol. 2010;20(10):895–903. pmid:20471265
- 580 31. Horák J. Regulations of sugar transporters: insights from yeast. Curr Genet. 2013;59(1–2):1–31.  
581 pmid:23455612
- 582 32. Brickwedde A, van den Broek M, Geertman J-MA, Magalhães F, Kuijpers NGA, Gibson B, et al.  
583 Evolutionary Engineering in Chemostat Cultures for Improved Maltotriose Fermentation Kinetics  
584 in *Saccharomyces pastorianus* Lager Brewing Yeast. Front Microbiol. 2017;8:1690.  
585 pmid:28943864
- 586 33. Jansen MLA, Daran-Lapujade P, de Winde JH, Piper MDW, Pronk JT. Prolonged maltose-limited  
587 cultivation of *Saccharomyces cerevisiae* selects for cells with improved maltose affinity and  
588 hypersensitivity. Appl Environ Microbiol. 2004;70(4):1956–63. pmid:15066785
- 589 34. Krogerus K, Seppänen-Laakso T, Castillo S, Gibson B. Inheritance of brewing-relevant phenotypes  
590 in constructed *Saccharomyces cerevisiae* × *Saccharomyces eubayanus* hybrids. Microb Cell Fact.  
591 2017;16(1):66. pmid:28431563
- 592 35. Krogerus K, Magalhães F, Vidgren V, Gibson B. New lager yeast strains generated by interspecific  
593 hybridization. J Ind Microbiol Biotechnol. 2015;42(5):769–78. pmid:25682107
- 594 36. Hebly M, Brickwedde A, Bolat I, Driessen MRM, de Hulster EAF, van den Broek M, et al. S.

- 595 *cerevisiae* × *S. eubayanus* interspecific hybrid, the best of both worlds and beyond. FEMS Yeast  
596 Res. 2015;15(3):fov005. pmid:25743788
- 597 37. Krogerus K, Arvas M, De Chiara M, Magalhães F, Mattinen L, Oja M, et al. Ploidy influences the  
598 functional attributes of de novo lager yeast hybrids. Appl Microbiol Biotechnol.  
599 2016;100(16):7203–22. pmid:27183995
- 600 38. Mertens S, Steensels J, Saels V, De Rouck G, Aerts G, Verstrepen KJ. A large set of newly created  
601 interspecific *Saccharomyces* hybrids increases aromatic diversity in lager beers. Appl Environ  
602 Microbiol. 2015;81(23):8202–14. pmid:26407881
- 603 39. Nikulin J, Krogerus K, Gibson B. Alternative *Saccharomyces* interspecies hybrid combinations and  
604 their potential for low-temperature wort fermentation. Yeast . 2018;35(1):113–27.  
605 pmid:28755430
- 606 40. Stewart GG. The genetic manipulation of industrial yeast strains. Can J Microbiol.  
607 1981;27(10):973–90.
- 608 41. Bilinski CA, Casey GP. Developments in sporulation and breeding of brewer's yeast. Yeast.  
609 1989;5(6):429–38.
- 610 42. Mukai N, Nishimori C, Fujishige W, Mizuno A, Takahashi T, Sato K. Beer Brewing Using a Fusant  
611 between a Sake Yeast and a Brewer's Yeast. J Biosci Bioeng. 2001;91(5):482–6. pmid:16233026
- 612 43. Yamakawa S, Yamada R, Tanaka T, Ogino C, Kondo A. Repeated batch fermentation from raw  
613 starch using a maltose transporter and amylase expressing diploid yeast strain. Appl Microbiol  
614 Biotechnol. 2010;87(1):109–15. pmid:20180115
- 615 44. Smit A, Moses SG, Pretorius IS, Cordero Otero RR. The Thr505 and Ser557 residues of the AGT1-  
616 encoded alpha-glucoside transporter are critical for maltotriose transport in *Saccharomyces*  
617 *cerevisiae*. J Appl Microbiol. 2008;104(4):1103–11. pmid:18179544
- 618 45. Smit A, Dissertation. Maltotriose Transport in Yeast. Stellenbosch University; 2007. Avialible

- 619 from:
- 620 [http://scholar.sun.ac.za/bitstream/handle/10019.1/21760/Smit\\_Maltotriose\\_1007.pdf?sequence=1&isAllowed=y](http://scholar.sun.ac.za/bitstream/handle/10019.1/21760/Smit_Maltotriose_1007.pdf?sequence=1&isAllowed=y)
- 621
- 622 46. Krogerus K, Magalhães F, Vidgren V, Gibson B. Novel brewing yeast hybrids: creation and
- 623 application. *Appl Microbiol Biotechnol.* 2017;101(1):65–78. pmid:27885413
- 624 47. Hittinger CT, Steele JL, Ryder DS. Diverse yeasts for diverse fermented beverages and foods. *Curr*
- 625 *Opin Biotechnol.* 2018;49:199–206. pmid:29102814
- 626 48. Libkind D, Hittinger CT, Valério E, Gonçalves C, Dover J, Johnston M, et al. Microbe domestication
- 627 and the identification of the wild genetic stock of lager-brewing yeast. *Proc Natl Acad Sci U S A.*
- 628 2011;108(35):14539–44. pmid:21873232
- 629 49. Gibson BR, Storgårds E, Krogerus K, Vidgren V. Comparative physiology and fermentation
- 630 performance of Saaz and Frohberg lager yeast strains and the parental species *Saccharomyces*
- 631 *eubayanus*. *Yeast.* 2013;30(7):255–66. pmid:23695993
- 632 50. Gibson B, Geertman J-MA, Hittinger CT, Krogerus K, Libkind D, Louis EJ, et al. New yeasts—new
- 633 brews: modern approaches to brewing yeast design and development. *FEMS Yeast Res.*
- 634 2017;17(4). pmid:28582493
- 635 51. Bing J, Han P-J, Liu W-Q, Wang Q-M, Bai F-Y. Evidence for a Far East Asian origin of lager beer
- 636 yeast. *Curr Biol.* 2014;24(10):R380-1. pmid:24845661
- 637 52. Peris D, Langdon QK, Moriarty R V., Sylvester K, Bontrager M, Charron G, et al. Complex
- 638 Ancestries of Lager-Brewing Hybrids Were Shaped by Standing Variation in the Wild Yeast
- 639 *Saccharomyces eubayanus*. *PLOS Genet.* 2016;12(7):e1006155. pmid:27385107
- 640 53. Peris D, Sylvester K, Libkind D, Gonçalves P, Sampaio JP, Alexander WG, et al. Population
- 641 structure and reticulate evolution of *Saccharomyces eubayanus* and its lager-brewing hybrids.
- 642 *Mol Ecol.* 2014;23(8):2031–45. pmid:24612382

- 643 54. Baker E, Wang B, Bellora N, Peris D, Hulfactor AB, Koshalek JA, et al. The Genome Sequence of  
644 *Saccharomyces eubayanus* and the Domestication of Lager-Brewing Yeasts. *Mol Biol Evol.*  
645 2015;32(11):2818–31. pmid:26269586
- 646 55. Nakao Y, Kanamori T, Itoh T, Kodama Y, Rainieri S, Nakamura N, et al. Genome sequence of the  
647 lager brewing yeast, an interspecies hybrid. *DNA Res.* 2009;16(2):115–29. pmid:19261625
- 648 56. Vidgren V, Multanen J-P, Ruohonen L, Londesborough J. The temperature dependence of  
649 maltose transport in ale and lager strains of brewer's yeast. *FEMS Yeast Res.* 2010;10(4):402–11.  
650 pmid:20402791
- 651 57. Cousseau FEM, Alves SL, Trichez D, Stambuk BU. Characterization of maltotriose transporters  
652 from the *Saccharomyces eubayanus* subgenome of the hybrid *Saccharomyces pastorianus* lager  
653 brewing yeast strain Weihenstephan 34/70. *Lett Appl Microbiol.* 2013;56(1):21–9.  
654 pmid:23061413
- 655 58. Nguyen H-V, Boekhout T. Characterization of *Saccharomyces uvarum* (Beijerinck, 1898) and  
656 related hybrids: assessment of molecular markers that predict the parent and hybrid genomes  
657 and a proposal to name yeast hybrids. *FEMS Yeast Res.* 2017;17(2).
- 658 59. Okuno M, Kajitani R, Ryusui R, Morimoto H, Kodama Y, Itoh T. Next-generation sequencing  
659 analysis of lager brewing yeast strains reveals the evolutionary history of interspecies  
660 hybridization. *DNA Res.* 2016;23(1):67–80. pmid:26732986
- 661 60. Vidgren V, Huuskonen A, Virtanen H, Ruohonen L, Londesborough J. Improved fermentation  
662 performance of a lager yeast after repair of its *AGT1* maltose and maltotriose transporter genes.  
663 *Appl Environ Microbiol.* 2009;75(8):2333–45. pmid:19181838
- 664 61. Vidgren V, Londesborough J. Characterization of the *Saccharomyces bayanus*-type *AGT1*  
665 transporter of lager yeast. *J Inst Brew.* 2012;118(2):148–51.
- 666 62. Day RE, Rogers PJ, Dawes IW, Higgins VJ. Molecular analysis of maltotriose transport and

- 667 utilization by *Saccharomyces cerevisiae*. Appl Environ Microbiol. 2002;68(11):5326–35.  
668 pmid:12406721
- 669 63. Vidgren V, Ruohonen L, Londesborough J. Characterization and functional analysis of the *MAL*  
670 and *MPH* Loci for maltose utilization in some ale and lager yeast strains. Appl Environ Microbiol.  
671 2005;71(12):7846–57. pmid:16332759
- 672 64. Bergström A, Simpson JT, Salinas F, Barré B, Parts L, Zia A, et al. A High-Definition View of  
673 Functional Genetic Variation from Natural Yeast Genomes. Mol Biol Evol. 2014;31(4):872–88.
- 674 65. Quan L, Lv Q, Zhang Y. STRUM: structure-based prediction of protein stability changes upon  
675 single-point mutation. Bioinformatics. 2016;32(19):2936–46. pmid:27318206
- 676 66. Ng PC, Henikoff S. Predicting deleterious amino acid substitutions. Genome Res. 2001;11(5):863–  
677 74. pmid:11337480
- 678 67. Day RE, Higgins VJ, Rogers PJ, Dawes IW. Characterization of the putative maltose transporters  
679 encoded by YDL247w and YJR160c. Yeast. 2002;19(12):1015–27. pmid:12210897
- 680 68. Stambuk BU, Alves SL, Hollatz C, Zastrow CR. Improvement of maltotriose fermentation by  
681 *Saccharomyces cerevisiae*. Lett Appl Microbiol. 2006;43(4):370–6. pmid: 16965366
- 682 69. Alves SL, Herberts RA, Hollatz C, Trichez D, Miletti LC, de Araujo PS, et al. Molecular analysis of  
683 maltotriose active transport and fermentation by *Saccharomyces cerevisiae* reveals a  
684 determinant role for the *AGT1* permease. Appl Environ Microbiol. 2008;74(5):1494–501.  
685 pmid:18203856
- 686 70. Blount ZD, Barrick JE, Davidson CJ, Lenski RE. Genomic analysis of a key innovation in an  
687 experimental *Escherichia coli* population. Nature. 2012;489(7417):513–8.
- 688 71. Fedoroff N V. Presidential address. Transposable elements, epigenetics, and genome evolution.  
689 Science. 2012;338(6108):758–67. pmid:23145453
- 690 72. Gresham D, Desai MM, Tucker CM, Jenq HT, Pai DA, Ward A, et al. The Repertoire and Dynamics

- 691 of Evolutionary Adaptations to Controlled Nutrient-Limited Environments in Yeast. Snyder M,  
692 editor. PLoS Genet. 2008;4(12):e1000303. pmid: 19079573
- 693 73. Dunham MJ, Badrane H, Ferea T, Adams J, Brown PO, Rosenzweig F, et al. Characteristic genome  
694 rearrangements in experimental evolution of *Saccharomyces cerevisiae*. Proc Natl Acad Sci U S A.  
695 2002;99(25):16144–9. pmid:12446845
- 696 74. Liti G, Louis EJ. YEAST EVOLUTION AND COMPARATIVE GENOMICS. Annu Rev Microbiol.  
697 2005;59(1):135–53. pmid: 15877535
- 698 75. Ehrenreich IM, Torabi N, Jia Y, Kent J, Martis S, Shapiro JA, et al. Dissection of genetically complex  
699 traits with extremely large pools of yeast segregants. Nature. 2010;464(7291):1039–42.  
700 pmid:20393561
- 701 76. Brauer MJ, Christianson CM, Pai DA, Dunham MJ. Mapping novel traits by array-assisted bulk  
702 segregant analysis in *Saccharomyces cerevisiae*. Genetics. 2006;173(3):1813–6. pmid:16624899
- 703 77. Segrè A V, Murray AW, Leu J-Y. High-Resolution Mutation Mapping Reveals Parallel Experimental  
704 Evolution in Yeast. PLoS Biol. 2006;4(8):e256. pmid:16856782
- 705 78. Stern DL. Identification of loci that cause phenotypic variation in diverse species with the  
706 reciprocal hemizyosity test. Trends Genet. 2014;30(12):547–54. pmid:25278102
- 707 79. Henikoff S, Henikoff JG. Amino acid substitution matrices from protein blocks. Proc Natl Acad Sci  
708 U S A. 1992;89(22):10915–9. pmid:1438297
- 709 80. Roy A, Kucukural A, Zhang Y. I-TASSER: a unified platform for automated protein structure and  
710 function prediction. Nat Protoc. 2010;5(4):725–38. pmid:20360767
- 711 81. Yang J, Yan R, Roy A, Xu D, Poisson J, Zhang Y. The I-TASSER Suite: protein structure and function  
712 prediction. Nat Methods. 2015;12(1):7–8. pmid:25549265
- 713 82. Zhang Y. I-TASSER server for protein 3D structure prediction. BMC Bioinformatics. 2008;9:40.  
714 pmid:18215316

- 715 83. Cheng Q, Michels CA. The maltose permease encoded by the *MAL61* gene of *Saccharomyces*  
716 *cerevisiae* exhibits both sequence and structural homology to other sugar transporters. *Genetics*.  
717 1989;123(3):477–84. pmid:2689282
- 718 84. Barrett MP, Walmsley AR, Gould GW. Structure and function of facultative sugar transporters.  
719 *Curr Opin Cell Biol*. 1999;11(4):496–502.
- 720 85. Yan N. Structural Biology of the Major Facilitator Superfamily Transporters. *Annu Rev Biophys*.  
721 2015;44:257–83. pmid:26098515
- 722 86. Khersonsky Olga, Tawfik DS. Enzyme Promiscuity: A Mechanistic and Evolutionary Perspective.  
723 *Annu Rev Biochem*. 2010;79(1):471–505. pmid:20235827
- 724 87. Mannige R V. Dynamic New World: Refining Our View of Protein Structure, Function and  
725 Evolution. *Proteomes*. 2014;2(1):128–53. pmid:28250374
- 726 88. Bashton M, Chothia C. The Generation of New Protein Functions by the Combination of Domains.  
727 *Structure*. 2007;15(1):85–99. pmid:17223535
- 728 89. Vogel C, Bashton M, Kerrison ND, Chothia C, Teichmann SA. Structure, function and evolution of  
729 multidomain proteins. *Curr Opin Struct Biol*. 2004;14(2):208–16. pmid:15093836
- 730 90. Furuta Y, Kobayashi I. Movement of DNA sequence recognition domains between non-  
731 orthologous proteins. *Nucleic Acids Res*. 2012;40(18):9218–32. pmid:22821560
- 732 91. Doolittle RF. The multiplicity of domains in proteins. *Annu Rev Biochem*. 1995;64:287–314.  
733 pmid:7574483
- 734 92. Mody A, Weiner J, Ramanathan S. Modularity of MAP kinases allows deformation of their  
735 signalling pathways. *Nat Cell Biol*. 2009;11(4):484–91. pmid:19295513
- 736 93. Drummond DA, Silberg JJ, Meyer MM, Wilke CO, Arnold FH. On the conservative nature of  
737 intragenic recombination. *Proc Natl Acad Sci U S A*. 2005;102(15):5380–5. pmid:15809422
- 738 94. Magalhães F, Vidgren V, Ruohonen L, Gibson B. Maltose and maltotriose utilisation by group I



- 739 strains of the hybrid lager yeast *Saccharomyces pastorianus*. FEMS Yeast Res. 2016;16(5).  
740 pmid:27364826
- 741 95. Altschul SF, Madden TL, Schäffer AA, Zhang J, Zhang Z, Miller W, et al. Gapped BLAST and PSI-  
742 BLAST: a new generation of protein database search programs. Nucleic Acids Res.  
743 1997;25(17):3389–402. pmid:9254694
- 744 96. Kearse M, Moir R, Wilson A, Stones-Havas S, Cheung M, Sturrock S, et al. Geneious Basic: An  
745 integrated and extendable desktop software platform for the organization and analysis of  
746 sequence data. Bioinformatics. 2012;28(12):1647–9. pmid:22543367
- 747 97. Parreiras LS, Breuer RJ, Avanasani Narasimhan R, Higbee AJ, La Reau A, Tremaine M, et al.  
748 Engineering and Two-Stage Evolution of a Lignocellulosic Hydrolysate-Tolerant *Saccharomyces*  
749 *cerevisiae* Strain for Anaerobic Fermentation of Xylose from AFEX Pretreated Corn Stover. PLoS  
750 One. 2014;9(9):e107499.
- 751 98. Alexander WG, Peris D, Pfannenstiel BT, Opulente DA, Kuang M, Hittinger CT. Efficient  
752 engineering of marker-free synthetic allotetraploids of *Saccharomyces*. Fungal Genet Biol.  
753 2016;89:10–7. pmid:26555931
- 754 99. Gietz DR, Woods RA. Transformation of yeast by lithium acetate/single-stranded carrier  
755 DNA/polyethylene glycol method. Methods Enzymol. 2002;350:87–96. pmid:12073338
- 756 100. Zhou X, Peris D, Kominek J, Kurtzman CP, Hittinger CT, Rokas A. in silico Whole Genome  
757 Sequencer and Analyzer (iWGS): A Computational Pipeline to Guide the Design and Analysis of de  
758 novo Genome Sequencing Studies. G3. 2016;6(11):3655–62. pmid:27638685
- 759 101. Weisenfeld NI, Yin S, Sharpe T, Lau B, Hegarty R, Holmes L, et al. Comprehensive variation  
760 discovery in single human genomes. Nat Genet. 2014;46(12):1350–5. pmid:25326702
- 761 102. Johnson MG, Gardner EM, Liu Y, Medina R, Goffinet B, Shaw AJ, et al. HybPiper: Extracting coding  
762 sequence and introns for phylogenetics from high-throughput sequencing reads using target

- 763 enrichment. Appl Plant Sci. 2016;4(7). pmid:27437175
- 764 103. Slater G, Birney E. Automated generation of heuristics for biological sequence comparison. BMC  
765 Bioinformatics. 2005;6:31. pmid:15713233
- 766 104. Bankevich A, Nurk S, Antipov D, Gurevich AA, Dvorkin M, Kulikov AS, et al. SPAdes: a new genome  
767 assembly algorithm and its applications to single-cell sequencing. J Comput Biol. 2012;19(5):455–  
768 77. pmid:22506599
- 769 105. Edgar RC. MUSCLE: multiple sequence alignment with high accuracy and high throughput. Nucleic  
770 Acids Res. 2004;32(5):1792–7. pmid:15034147
- 771 106. Suyama M, Torrents D, Bork P. PAL2NAL: robust conversion of protein sequence alignments into  
772 the corresponding codon alignments. Nucleic Acids Res. 2006;34(Web Server):W609–12.  
773 pmid:16845082
- 774 107. Strobe PK, Skelly DA, Kozmin SG, Mahadevan G, Stone EA, Magwene PM, et al. The 100-genomes  
775 strains, an *S. cerevisiae* resource that illuminates its natural phenotypic and genotypic variation  
776 and emergence as an opportunistic pathogen. Genome Res. 2015;25(5):762–74. pmid:25840857
- 777 108. Charron MJ, Michels CA. The naturally occurring alleles of *MAL1* in *Saccharomyces* species  
778 evolved by various mutagenic processes including chromosomal rearrangement. Genetics.  
779 1988;120(1):83–93. pmid:2851483
- 780 109. Bromberg Y, Rost B. Correlating protein function and stability through the analysis of single  
781 amino acid substitutions. BMC Bioinformatics. 2009;10(Suppl 8). pmid:19758472
- 782 110. Ng PC, Henikoff S. Accounting for human polymorphisms predicted to affect protein function.  
783 Genome Res. 2002;12(3):436–46. pmid:11875032
- 784 111. Ng PC, Henikoff S. SIFT: Predicting amino acid changes that affect protein function. Nucleic Acids  
785 Res. 2003;31(13):3812–4. pmid:12824425
- 786 112. Ng PC, Henikoff S. Predicting the Effects of Amino Acid Substitutions on Protein Function. Annu

787 Rev Genomics Hum Genet. 2006;7:61–80. pmid:16824020

788 113. Kumar P, Henikoff S, Ng PC. Predicting the effects of coding non-synonymous variants on protein  
789 function using the SIFT algorithm. Nat Protoc. 2009;4(8):1073–81. pmid:19561590

## 790 **Figure Legends**

791 **Fig 1. Alignment of *AGT1*-like genes.** A) Tables highlighting the nucleotide (nuc) and amino acid (aa)  
792 percent identities between members of the *AGT1* family. Darker colors indicate greater sequence  
793 similarity. B) Multiple sequence alignment between nucleotide sequences of *tbAGT1*, *IgAGT1*, and  
794 *ncAGT1*. Black lines indicate nucleotide differences. C) Multiple sequence alignments between protein  
795 sequences of *tbAGT1*, *IgAGT1*, and *ncAGT1*. White gaps indicate amino acid differences.

796 **Fig 2. Phylogeny of *Saccharomyces MALT* genes.** ML phylogenetic tree of *MALT* genes described in *S.*  
797 *cerevisiae*, *S. eubayanus*, and lager-brewing hybrids. The scale bar equals the number of nucleotide  
798 substitutions per site. Black “\*” indicate genes characterized as encoding proteins capable of  
799 transporting maltotriose. Gray “\*” indicates genes encoding transporters whose ability to transport  
800 maltotriose is ambiguous.

801 **Fig 3. Evolution and validation of the chimeric maltotriose transporter Malt434.** A) After continuous  
802 culturing on maltotriose with a small amount of added glucose, yHKS210, which was originally unable to  
803 use maltotriose (MalTri-), evolved the ability to consume maltotriose (MalTri+). B) Strain yHEB1593,  
804 which is a backcross between yHKS210 and yHEB1505, was also MalTri+. C) To test the inheritance of  
805 maltotriose utilization, yHEB1593 was sporulated. The panel shows a subset of tetrads screened growing  
806 on SC + 2% maltotriose. Examples of MalTri- spores in Tetrad 1 are circled in red, and MalTri+ examples  
807 are circled in green. Whole genome sequencing of MalTri+ and MalTri- pools showed that maltotriose  
808 utilization perfectly correlated with the presence/absence of *MALT434*. D) Reciprocal hemizyosity test  
809 (78) of the *MALT4/MALT434* locus in the backcross strain yHEB1593. E) Table of initial and day-three

810 OD<sub>600</sub> (OD) readings of yHKS210, yHEB1505, yHEB1593, yHEB1853, and yHEB1854 on SC + 2%  
811 maltotriose as the sole carbon source. N = 3, standard deviation in parentheses. \* Control grown in SC +  
812 0.04% glucose to reflect the approximate amount of growth expected from contamination with other  
813 carbon sources when using 98% pure maltotriose.

814 **Fig 4. Sequence architecture of *MALT434*.** A) Schematic of the origin of *MALT434*. B) Line graphs  
815 representing the identity between nucleotide sequences of *MALT3* and *MALT4* from yHKS210 to  
816 *MALT434* over 10-bp sliding windows. C-D) Segment of the alignment of the chimeric region between  
817 Malt3, Malt4, Malt434, scAgt1, and IgAgt1. The region highlighted in yellow in the Malt434 sequence  
818 indicates the chimeric region. The regions underlined with a red dashed line are predicted  
819 transmembrane domains. The amino acids highlighted in red are predicted maltose-binding residues.  
820 The residues highlighted in blue were experimentally found to be important for maltotriose transport by  
821 Smit *et al.* 2008.

822 **Fig 5. Heterologous expression of *MALT434*.** A) Evolution of non-maltotriose utilizing strain (MalTri-),  
823 yHKS210, to maltotriose utilizing (MalTri+) strain, yHEB1505, by serial passing on maltotriose containing  
824 media (same as Fig 3A). B) Insertion of *MALT434* into vector pBM5155 for doxycycline-inducible  
825 heterologous expression in MalTri- strains. C) Transformation of *MALT434* expression plasmid in MalTri-  
826 *S. eubayanus* strains yHKS210 and yHRVM108. D) Table of initial and day-six OD<sub>600</sub> (OD) measurements  
827 of parent strains and strains carrying the *MALT434* expression plasmid grown in SC media with  
828 maltotriose as the sole carbon and doxycycline to induce plasmid expression. N = 3, standard deviation  
829 in parentheses. \* Control grown in SC + 0.04% glucose + doxycycline to reflect the approximate amount  
830 of growth expected from contamination with other carbon sources when using 98% pure maltotriose.  
831

## 832 **Supporting Information**

833 **S1 Fig. Protein structural alignment between Malt3, Malt4, Malt434, scAgt1, and IgAgt1.** Protein  
834 structural alignment between Malt3, Malt4, Malt434, scAgt1, and IgAgt1. The purple blocks represent  
835 predicted alpha helices, and the orange lines represent predicted beta strands. Red ticks mark predicted  
836 maltose-binding sites. Blue ticks mark residues found to be important for maltotriose transport by Smit  
837 *et al.* 2008. A green tick marks the location of the single non-synonymous substitution between *IgAGT1*  
838 and *tbAGT1*. Arrows point to alpha helices in Malt434 whose predicted sizes are reduced compared to  
839 other transporters in the alignment.

840 **S1 Table. Mutation prediction analyses.** Results of mutation prediction analyses for E18V, the sole  
841 amino acid substitution in the IgAgt1 protein sequence, relative to tbAgt1.

842 **S2 Table. Maltose growth assay.** Growth on maltose of single-colony isolates. Isolated from adaptive  
843 evolution of yHRVM108 on 2% maltose + 0.1% glucose. N = 3. \* Control grown in SC + 0.04% glucose to  
844 reflect the approximate amount of growth expected from contamination with other carbon sources  
845 when using 98% pure maltotriose.

846 **S3 Table. Maltotriose growth assay.** Growth on maltotriose of single-colony isolates from adaptive  
847 evolution experiments. Strains were evolved with either maltotriose or maltose as the primary carbon  
848 source (2%) with 0.1% added glucose. N = 3. \* Control grown in SC + 0.04% glucose to reflect the  
849 approximate amount of growth expected from contamination with other carbon sources when using  
850 98% pure maltotriose.

851 **S4 Table. Strains and plasmids used in this work.**

852 **S5 Table: Oligonucleotides used in this work.**

A.

| nuc           | <i>lgAGT1</i> | <i>ncAGT1</i> | <i>scAGT1</i> | <i>AGT1</i> |
|---------------|---------------|---------------|---------------|-------------|
| <i>tbAGT1</i> | 99.89         | 95.74         | 79.26         | 80.16       |
| <i>lgAGT1</i> |               | 95.63         | 79.15         | 80.05       |
| <i>ncAGT1</i> |               |               | 79.75         | 80.66       |
| <i>scAGT1</i> |               |               |               | 98.64       |

| aa            | <i>lgAgt1</i> | <i>ncAgt1</i> | <i>scAgt1</i> | <i>Agt1</i> |
|---------------|---------------|---------------|---------------|-------------|
| <i>tbAgt1</i> | 99.84         | 95.57         | 83.74         | 86.07       |
| <i>lgAgt1</i> |               | 95.41         | 83.58         | 85.90       |
| <i>ncAgt1</i> |               |               | 83.25         | 85.41       |
| <i>scAgt1</i> |               |               |               | 97.24       |

B.

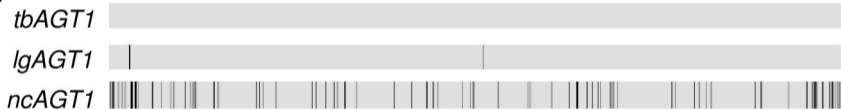

C.

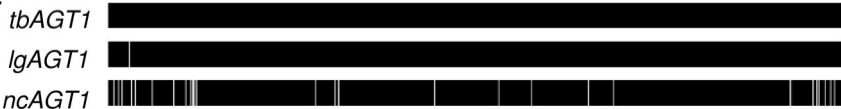

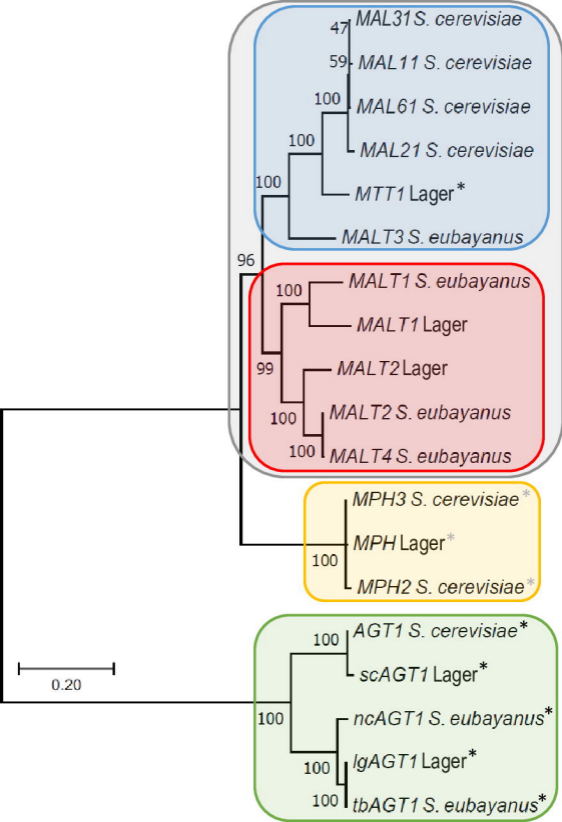

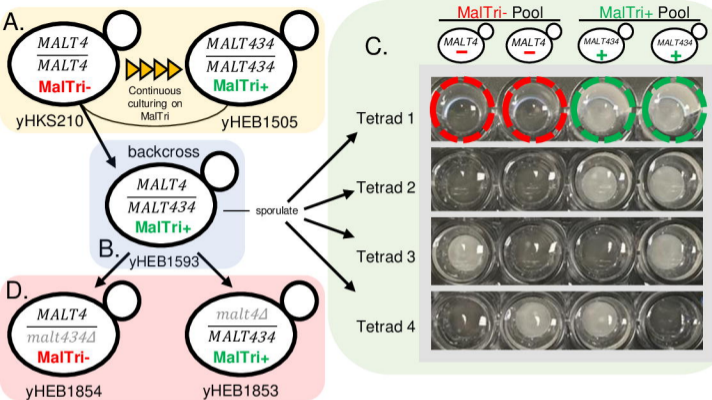

**E.**

| Strain   | Description                                             | Initial OD     | Day 3           |
|----------|---------------------------------------------------------|----------------|-----------------|
| yHKS210* | Wild admixture strain                                   | 0.22 (+/-0.01) | 0.68 (+/-0.06)  |
| yHKS210  | Wild admixture strain                                   | 0.14 (+/-0.02) | 0.39 (+/- 0.01) |
| yHEB1505 | Single-colony isolate of yHKS210 evolved in maltotriose | 0.16 (+/-0.02) | 1.46 (+/- 0.01) |
| yHEB1593 | yHKS210 x yHEB1505                                      | 0.12 (+/-0.01) | 1.24 (+/- 0.02) |
| yHEB1854 | yHEB1593 <i>MALT4/malt434Δ</i>                          | 0.13 (+/-0.01) | 0.39 (+/- 0.01) |
| yHEB1853 | yHEB1593 <i>malt4Δ/MALT434</i>                          | 0.11 (+/-0.01) | 1.33 (+/- 0.04) |



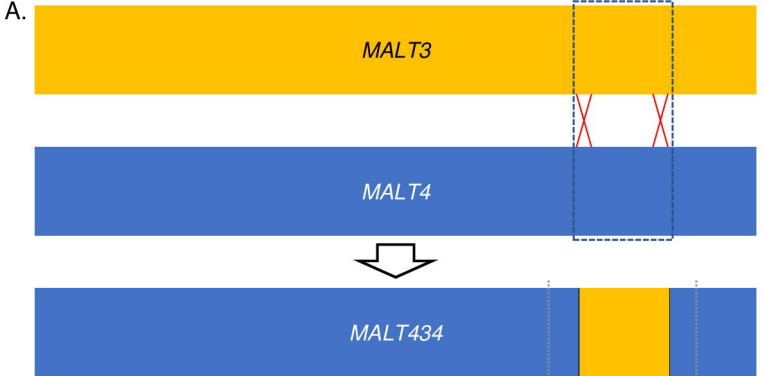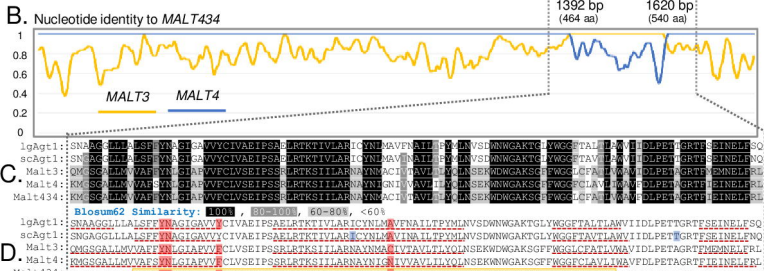

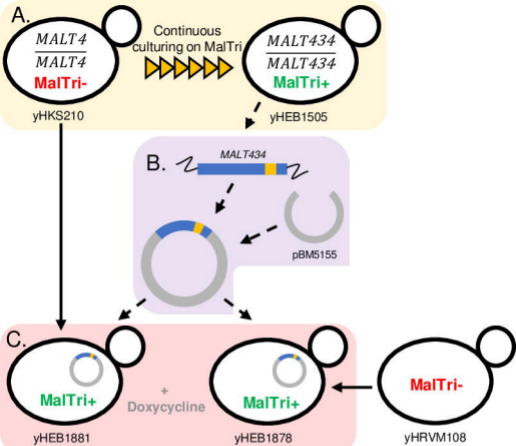

**D.**

| Strain    | Plasmid        | Initial OD      | Day 6           |
|-----------|----------------|-----------------|-----------------|
| yHKS210*  | -              | 0.19 (+/-0.04)  | 0.52 (+/-0.03)  |
| yHKS210   | -              | 0.14 (+/-0.02)  | 0.39 (+/-0.05)  |
| yHEB1881  | <i>MALT434</i> | 0.11 (+/- 0.01) | 1.31 (+/- 0.05) |
| yHRVM108* | -              | 0.16 (+/-0.05)  | 0.48 (+/-0.01)  |
| yHRVM108  | -              | 0.12 (+/-0.03)  | 0.46 (+/-0.03)  |
| yHEB1878  | <i>MALT434</i> | 0.12 (+/-0.01)  | 1.46 (+/-0.04)  |
